# Supplementary material for: Identification of geometrical isomers using vibrational circular dichroism spectroscopy: a series of mixed-ligand complexes of diamagnetic Co(iii) ions
Source: Royal Society of Chemistry journal article supplement (doi:10.1039/c0dt01342k), 2010-12-20
Supplement: c0dt01342k.pdf [file c0dt01342k.pdf]

## Supporting Information

# Identification of Geometrical Isomers Using Vibrational Circular Dichroism Spectroscopy: A Series of Mixed-Ligand Complexes of Diamagnetic Co(III) Ions

Hisako Sato, Hidemitsu Uno and Haruyuki Nakano

Chromatographic separation of the bis(tfac) complexes of  $[\text{Co}(\text{tfac})_2(\text{acac})]$

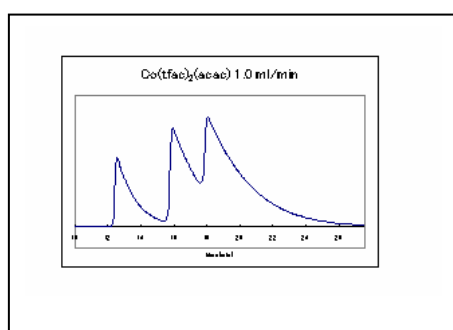

**Figure S1.** Chromatographic separation of the bis(tfac) complexes of  $[\text{Co}(\text{tfac})_2(\text{acac})]$  The complexes were eluted with benzene at a flow rate of  $1 \text{ mLmin}^{-1}$  by silica gel column. The first, second and third peak is identified as **trans-cis**, **cis-trans** and **cis-cis** isomers, respectively.

### <sup>1</sup>H NMR

The <sup>1</sup>H NMR spectra (JNM-AL400, JEOL, Japan) were measured on the CDCl<sub>3</sub> solutions of metal complexes. The chemical shift values (δ) and peak areas are given below.

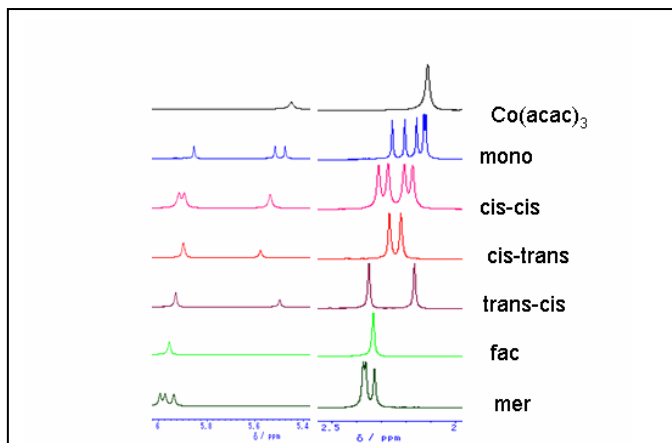

**Figure S2.** The <sup>1</sup>H NMR spectra were measured on the CDCl<sub>3</sub> solutions of metal complexes:

[Co(tfac)<sub>n</sub>(acac)<sub>3-n</sub>] (n = 0 ~ 3): (a) mono(tfac) complexes (n = 1); (b) bis(tfac) complexes (n = 2); (**trans-cis**, **cis-trans** and **cis-cis**) (c) tris(tfac) complexes (n = 3) (**mer** and **fac**).

**Co(tfac)(acac)<sub>2</sub>**: (400 MHz, CDCl<sub>3</sub>) δ(ppm) 5.85 (s,1H), 5.52 (s,1H), 5.48 (s,1H), 2.26 (s,3H), 2.20 (s,3H), 2.16 (s,3H), 2.13 (s,3H), 2.12 (s,3H)

**trans-cis** – [Co(tfac)<sub>2</sub>(acac)]: (400 MHz, CDCl<sub>3</sub>) δ (ppm) 5.93 (s,2H), 5.50 (s,1H), 2.35 (s,6H), 2.16 (s,6H)

**cis-trans** – [Co(tfac)<sub>2</sub>(acac)]: (400 MHz, CDCl<sub>3</sub>) δ (ppm) 5.90 (s,2H), 5.58 (s,1H), 2.27 (s,6H), 2.22 (s,6H)

**cis-cis** – [Co(tfac)<sub>2</sub>(acac)]: (400 MHz, CDCl<sub>3</sub>) δ (ppm) 5.92 (s,1H), 5.90 (s,1H), 5.54 (s,1H), 2.31 (s,3H), 2.27 (s,3H), 2.21 (s,3H), 2.17 (s,3H)

**fac** – [Co(tfac)<sub>3</sub>]: (400 MHz, CDCl<sub>3</sub>) δ (ppm) 5.96 (s,3H), 2.33 (s,3H)

**mer** – [Co(tfac)<sub>3</sub>]: (400 MHz, CDCl<sub>3</sub>) δ (ppm) 5.99 (s,1H), 5.97 (s,1H), 5.94 (s,1H), 2.37 (s,3H), 2.36 (s,3H), 2.33 (s,3H)

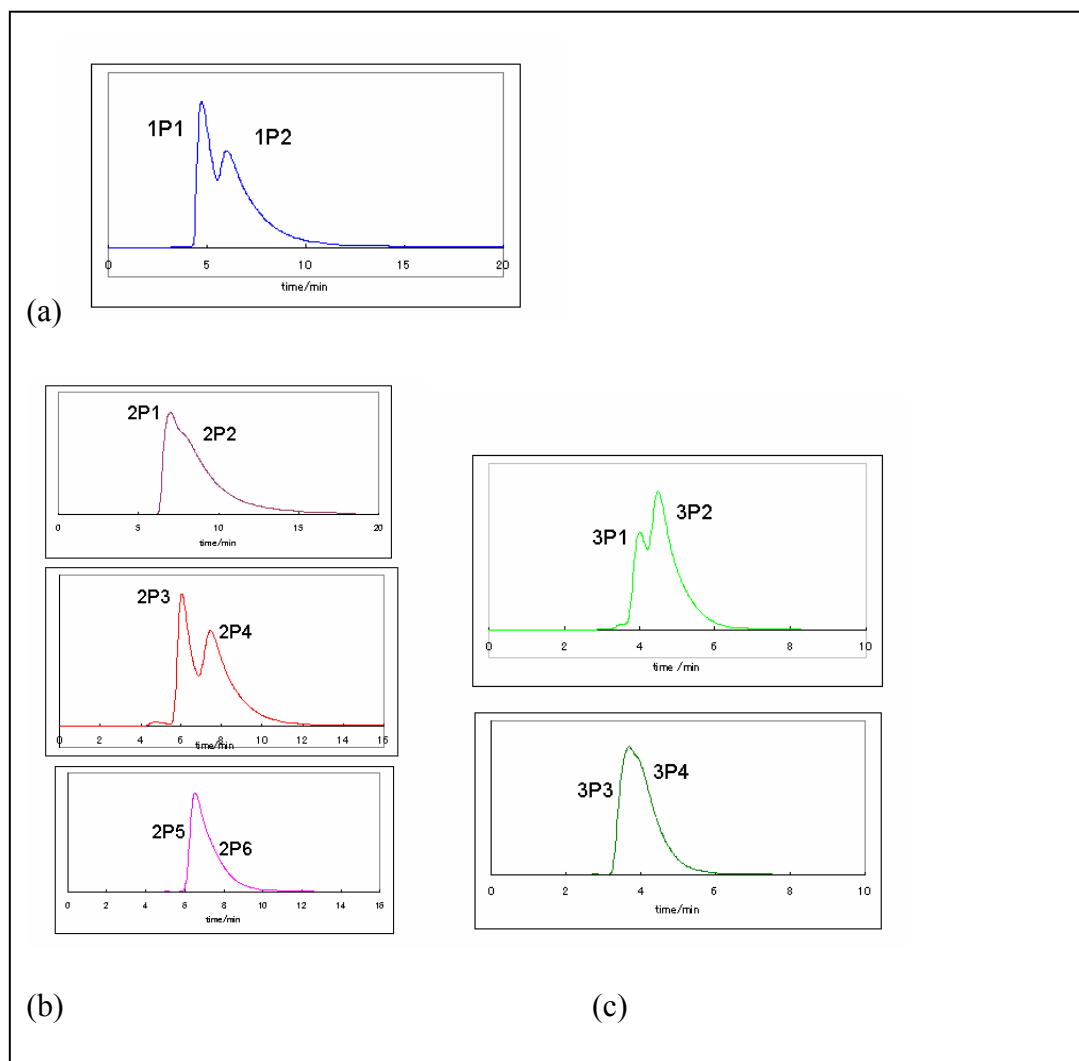

**Figure S3.** Chromatograms for the separation of the enantiomer pairs of  $[\text{Co}(\text{tfac})_n(\text{acac})_{3-n}]$  ( $n = 0 \sim 3$ ): (a) mono(tfac) complex ( $n = 1$ ); (b) bis(tfac) complexes ( $n = 2$ ); (c) tris(tfac) complexes ( $n = 3$ ). The complexes were eluted with methanol at a flow rate of  $1 \text{ mL}\cdot\text{min}^{-1}$  and  $40^\circ\text{C}$ . The column was packed with an ion-exchange adduct of  $\Delta\text{-}[\text{Ru}(\text{phen})_3]^{2+}$ /synthetic hectorite.

Two peaks (denoted by  $1\text{P}_1$  and  $1\text{P}_2$ , respectively) were obtained in  $[\text{Co}(\text{tfac})(\text{acac})_2]$ .

A racemic mixture of bis(tfac) complexes **trans-cis**, **cis-trans** and **cis-cis**- $[\text{Co}(\text{tfac})_2(\text{acac})]$  was eluted with methanol on the same column after silica gel column of HPLC. These peaks (denoted by **trans-cis** ( $2\text{P}_1$ ,  $2\text{P}_2$ ), **cis-trans** ( $2\text{P}_3$ ,  $2\text{P}_4$ ) and **cis-cis** ( $2\text{P}_5$ ,  $2\text{P}_6$ ), respectively) were obtained.

The fac- $[\text{Co}(\text{tfac})_3]$  was eluted with methanol on the same column. The peaks (denoted by  $3\text{P}_1$ ,  $3\text{P}_2$ , respectively) were obtained on separation. The mer- $[\text{Co}(\text{tfac})_3]$  is not separated by two parts. We have two sections of collected and named as  $3\text{P}_3$  and  $3\text{P}_4$ .

### Circular dichroism spectra

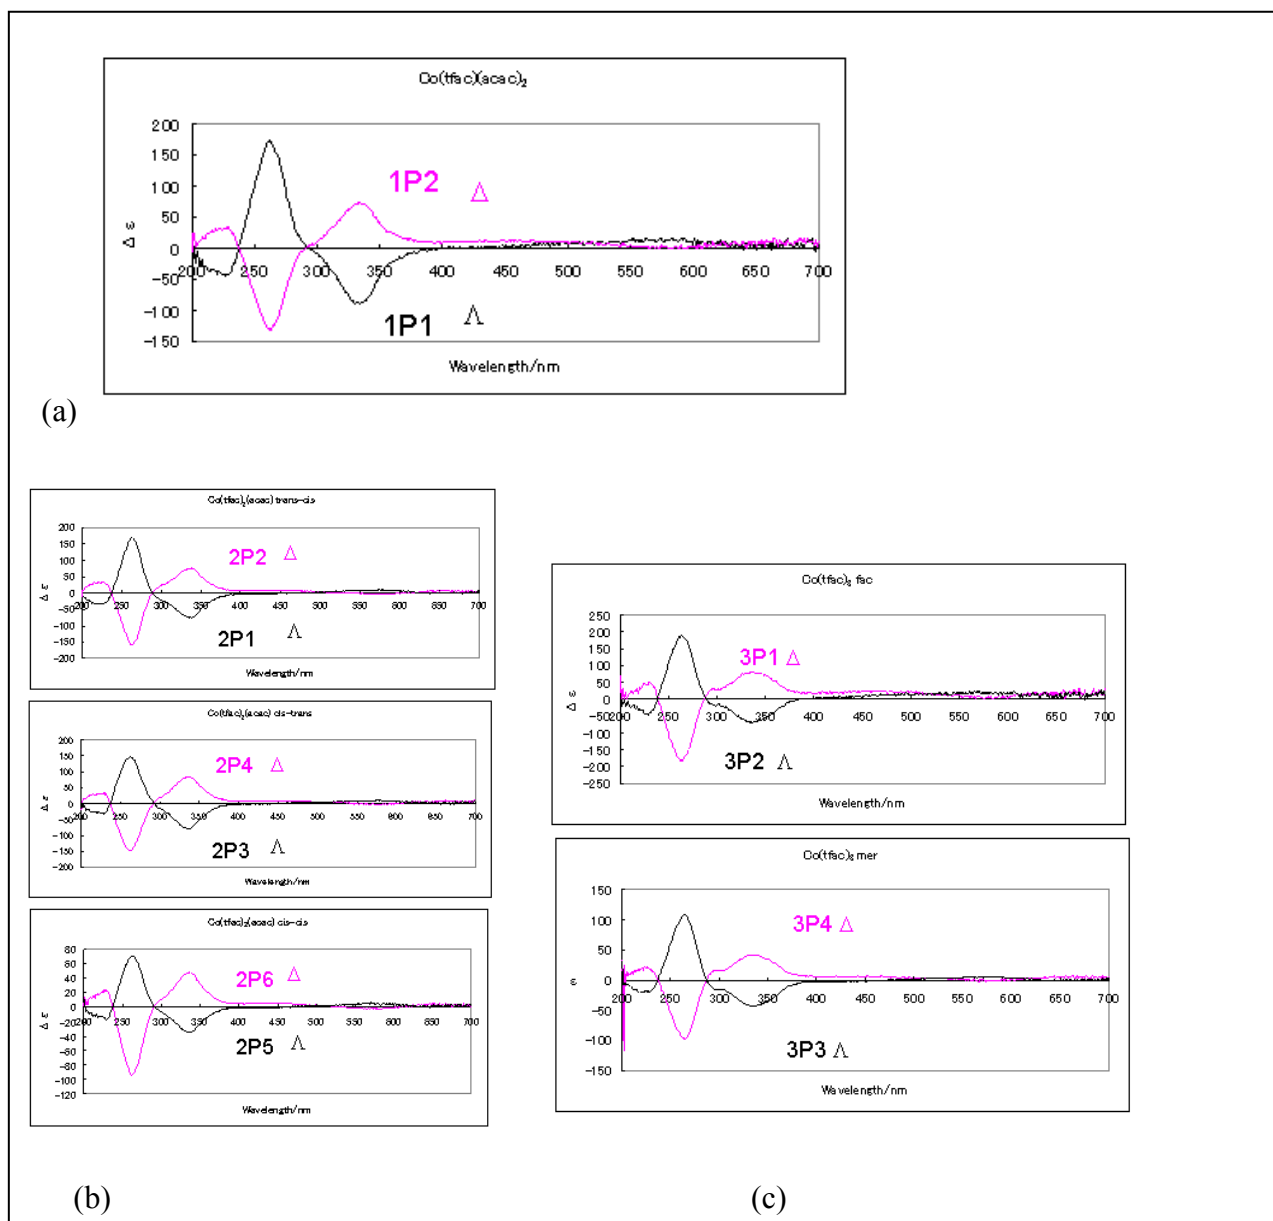

**Figure S4.** Circular dichroism spectra of  $[\text{Co}(\text{tfac})_n(\text{acac})_{3-n}]$  ( $n = 0 - 3$ )

Black and pink curves are for  $\Lambda$  and  $\Delta$ - isomer, respectively. From the CD spectra of these fractions, **3P<sub>1</sub>** and **3P<sub>2</sub>** of HPLC (Figure S3) were concluded to contain  $\Delta$ -isomer and  $\Lambda$ -isomers, respectively. In other isomers, peak 1 and peak 2 were concluded to contain  $\Lambda$ - and  $\Delta$ - isomer, respectively.

The molar extinction coefficient ( $\epsilon$ ) and  $\Delta\epsilon$  were determined from the methanol solution of each isomer as given below.

**[Co(tfac)(acac)<sub>2</sub>]:**  $\epsilon$  (112.8 at 594 nm),  $\epsilon$  (7115 at 325 nm) : ( $\Lambda$ -isomer):  $\Delta\epsilon$  (-2.34 at 652 nm).  $\Delta\epsilon$  (7.09 at 576 nm) ( $\Delta$ -isomer):  $\Delta\epsilon$  (+2.41 at 650 nm).  $\Delta\epsilon$  (-4.93 at 571 nm), IR;  $\epsilon$  1852 (1521  $\text{cm}^{-1}$ )

**[Co(tfac)<sub>2</sub>(acac)]: trans-cis:**  $\epsilon$  (115.4 at 594 nm) ,  $\epsilon$  (6154 at 325 nm):  $\Lambda$ -isomer  $\Delta\epsilon$  (-3.27 at 659 nm);  $\Delta\epsilon$  (7.48 at 575 nm)  $\Delta$ -isomer  $\Delta\epsilon$  (+3.56 at 661 nm)  $\Delta\epsilon$  (-6.43 at 572 nm) IR;  $\epsilon$  1015 (1522  $\text{cm}^{-1}$ )

**cis-trans:**  $\epsilon$  (126 at 598 nm),  $\epsilon$  (6194 at 325 nm) : ( $\Lambda$ -isomer):  $\Delta\epsilon$  (-2.66 at 646nm);  $\Delta\epsilon$  (6.72 at 574 nm) ( $\Delta$ -isomer):  $\Delta\epsilon$  (+3.16, 642nm);  $\Delta\epsilon$  (-6.47 at 575 nm), IR IR;  $\epsilon$  902 (1522  $\text{cm}^{-1}$ )

**cis-cis:**  $\epsilon$  (112 at 593 nm),  $\epsilon$  (5872 at 325nm): ( $\Lambda$ -isomer):  $\Delta\epsilon$  (-1.53at 647nm);  $\Delta\epsilon$  (4.53 at 573 nm) ( $\Delta$ -isomer):  $\Delta\epsilon$  (+2.52, 651 nm);  $\Delta\epsilon$  (-4.63at 576 nm), IR;  $\epsilon$  1090 (1521  $\text{cm}^{-1}$ )

**[Co(tfac)<sub>3</sub>]: fac:**  $\epsilon$  (112 at 596 nm) ,  $\epsilon$  (6194 at 325nm): ( $\Lambda$ -isomer):  $\Delta\epsilon$  (-2.07at 653 nm);  $\Delta\epsilon$  (7.21 at 577 nm) ( $\Delta$ -isomer):  $\Delta\epsilon$  (3.24 at 656 nm);  $\Delta\epsilon$  (-6.86 at 578 nm), IR;  $\epsilon$  673 (1527  $\text{cm}^{-1}$ )

**mer:**  $\epsilon$  (137 at 598 nm),  $\epsilon$  (6487 at 325nm): ( $\Lambda$ -isomer):  $\Delta\epsilon$  (-2.95 at 657 nm);  $\Delta\epsilon$  (6.52 at 578 nm) ( $\Delta$ -isomer):  $\Delta\epsilon$  (3.57at 656 nm);  $\Delta\epsilon$  (-4.54 at 577 nm), IR;  $\epsilon$  619 (1527  $\text{cm}^{-1}$ )

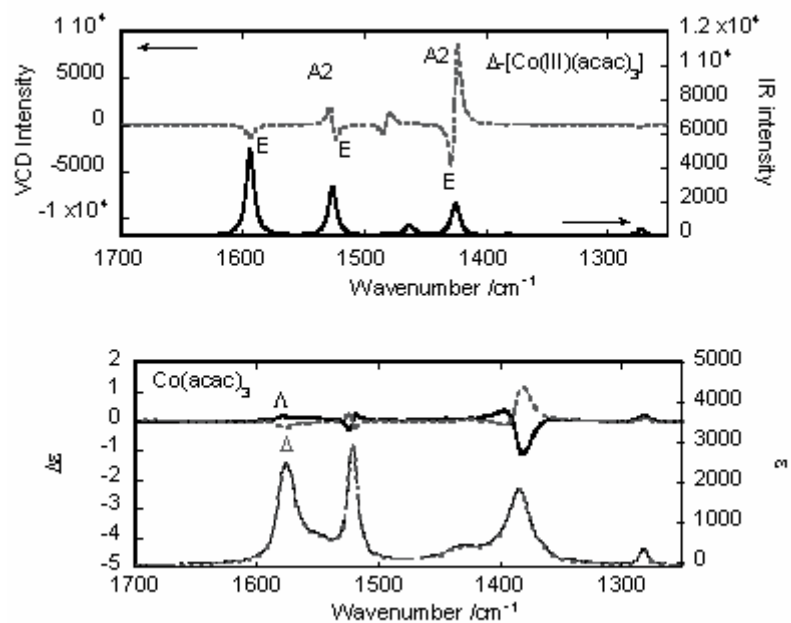

**Figure S5.** Vibrational circular dichroism spectra of  $\Delta$ -Co(acac)<sub>3</sub>: calculation (upper) and observation (lower) (solvent: CDCl<sub>3</sub>).
